# Supplementary material for: The 20-Year Longitudinal Trajectories of Social Functioning in Individuals With Psychotic Disorders
Source: Atypon-hosted journal article supplement (doi:10.1176/appi.ajp.2016.15111419), 2016-12-16
Supplement: appi.ajp.2016.15111419.ds001.pdf [file appi.ajp.2016.15111419.ds001.pdf]

**TABLE S1. Fit indices LCGA**

| <b>Number of Classes</b> | <b>Entropy</b> | <b>Bayesian Information Criterion</b> | <b>Akaike Information Criterion</b> | <b>Vuong-Lo-Mendell-Rubin Likelihood Test p Value</b> |
|--------------------------|----------------|---------------------------------------|-------------------------------------|-------------------------------------------------------|
| 1                        | N/A            | 10663.872                             | 10634.583                           | N/A                                                   |
| 2                        | 0.775          | 10133.444                             | 10091.602                           | <0.0001                                               |
| 3                        | 0.700          | 10038.615                             | 9984.221                            | 0.0002                                                |
| <b>4</b>                 | <b>0.646</b>   | <b>10030.558</b>                      | <b>9963.611</b>                     | <b>0.035</b>                                          |
| 5                        | 0.653          | 10032.728                             | 9953.229                            | 0.153                                                 |
